# Supplementary material
Source: PubMed Central journal article supplement (PMC2423025)
Supplement: supp_74_11_3559__1.pdf [file supp_74_11_3559__1.pdf]

**Supplemental materials for** Complete genome sequence of *Nitrosospira multiformis*, an ammonia-oxidizing bacterium from the soil environment by Jeanette M. Norton, \* Martin G. Klotz, Lisa Y. Stein, Daniel J. Arp, Peter J. Bottomley, Patrick S.G. Chain, Loren J. Hauser, Miriam L. Land, Frank W. Larimer, Maria W. Shin, Shawn R. Starkenburg

**Supplemental Table 1.** Detail list of the 187 regulatory proteins in *N. multiformis*

|                                                              |           |
|--------------------------------------------------------------|-----------|
| <b>Transcription/Elongation/Termination Factors</b>          | <b>98</b> |
| <b>Sigma Factors</b>                                         | <b>8</b>  |
| RNA polymerase, sigma 28 subunit, FliA/WhiG                  | 1         |
| RNA polymerase, sigma 32 subunit, RpoH                       | 1         |
| RNA polymerase, sigma 54 subunit, RpoN                       | 1         |
| RNA polymerase, sigma 70 subunit, RpoD                       | 1         |
| RNA polymerase, sigma 70 subunit, RpoD family                | 1         |
| RNA polymerase, sigma-24 subunit, ECF subfamily              | 3         |
| <b>Anti/Anti-Anti Sigma Factors</b>                          | <b>6</b>  |
| anti sigma-E protein, RseA                                   | 1         |
| anti-sigma-28 factor, FlgM                                   | 1         |
| anti-sigma-factor antagonist                                 | 1         |
| putative sigma 54 modulation protein/ribosomal protein S30EA | 1         |
| sigma 54 modulation protein/ribosomal protein S30EA          | 1         |
| sigma E regulatory protein, MucB/RseB                        | 1         |
| <b>Termination/Antitermination Factor</b>                    | <b>4</b>  |
| NusA antitermination factor                                  | 1         |
| NusB antitermination factor                                  | 1         |
| NusG antitermination factor                                  | 1         |
| transcription termination factor Rho                         | 1         |
| <b>Elongation Factors</b>                                    | <b>3</b>  |
| GreA/GreB family elongation factor                           | 1         |
| transcription elongation factor GreA                         | 1         |
| transcription elongation factor GreB                         | 1         |
| <b>Transcription Factors</b>                                 | <b>77</b> |
| Flagellar transcriptional activator, FlhC subunit            | 1         |
| Flagellar transcriptional activator, FlhD subunit            | 1         |
| cold-shock DNA-binding domain protein                        | 4         |
| ferric uptake regulator, Fur family                          | 2         |
| heat-inducible transcription repressor HrcA                  | 1         |
| phage transcriptional regulator, AlpA                        | 2         |
| phosphate uptake regulator, PhoU                             | 1         |
| putative prophage repressor                                  | 1         |
| putative transcriptional activator, Baf family               | 1         |

|                                                                        |           |
|------------------------------------------------------------------------|-----------|
| putative transcriptional regulator                                     | 4         |
| putative transcriptional regulator, CopG family                        | 2         |
| putative transcriptional regulator, Crp/Fnr family                     | 3         |
| putative transcriptional regulator, TetR family                        | 1         |
| putative transcriptional regulator, XRE family                         | 2         |
| sigma54 specific transcriptional regulator, Fis family                 | 1         |
| transcriptional regulator, AraC family                                 | 1         |
| transcriptional regulator, ArsR family                                 | 1         |
| transcriptional regulator, BadM/Rrf2 family                            | 3         |
| transcriptional regulator, Crp/Fnr family                              | 4         |
| transcriptional regulator, Fis family                                  | 1         |
| transcriptional regulator, GntR family                                 | 1         |
| transcriptional regulator, HxIR family                                 | 2         |
| transcriptional regulator, LuxR family                                 | 5         |
| transcriptional regulator, LysR family                                 | 6         |
| transcriptional regulator, MerR family                                 | 1         |
| transcriptional regulator, TetR family                                 | 5         |
| transcriptional regulator, XRE family                                  | 8         |
| transcriptional regulator, putative ATPase, winged helix family        | 1         |
| transcriptional regulator/antitoxin, MazE                              | 1         |
| two component transcriptional regulator, Fis family                    | 1         |
| two component transcriptional regulator, LuxR family                   | 4         |
| two component transcriptional regulator, winged helix family           | 2         |
| two component, sigma54 specific, transcriptional regulator, Fis family | 3         |
| <b>Signal Transduction proteins</b>                                    | <b>89</b> |
| <b>Chemotaxis Signal Transduction Proteins</b>                         | <b>6</b>  |
| <b>Chemotaxis Sensory Transducers (receptors)</b>                      | <b>1</b>  |
| methyl-accepting chemotaxis sensory transducer                         | 1         |
| <b>Other Chemotaxis Signal Transduction Proteins</b>                   | <b>5</b>  |
| CheA signal transduction histidine kinases                             | 1         |
| CheW protein                                                           | 2         |
| MCP methyltransferase, CheR-type with TPR repeats                      | 1         |
| response regulator receiver modulated CheB methylesterase              | 1         |
| <b>NON-Chemotaxis Signal Transduction</b>                              | <b>83</b> |
| <b>Signal Transduction Histidine Kinases (STHK)</b>                    | <b>23</b> |
| PAS/PAC sensor hybrid histidine kinase                                 | 3         |
| PAS/PAC sensor signal transduction histidine kinase                    | 3         |
| histidine kinase                                                       | 3         |
| integral membrane sensor hybrid histidine kinase                       | 1         |
| integral membrane sensor signal transduction histidine kinase          | 6         |
| multi-sensor hybrid histidine kinase                                   | 3         |
| multi-sensor signal transduction histidine kinase                      | 3         |
| putative signal transduction histidine kinase                          | 1         |

|                                                                                                    |           |
|----------------------------------------------------------------------------------------------------|-----------|
| <b>Cyclic Nucleotide Signal Transduction</b>                                                       | <b>21</b> |
| cyclic nucleotide-binding protein                                                                  | 1         |
| diguanylate cyclase                                                                                | 2         |
| diguanylate cyclase with PAS/PAC sensor                                                            | 2         |
| diguanylate cyclase/phosphodiesterase                                                              | 1         |
| diguanylate cyclase/phosphodiesterase with PAS/PAC and Chase sensor(s)                             | 1         |
| diguanylate cyclase/phosphodiesterase with PAS/PAC sensor(s)                                       | 6         |
| diguanylate phosphodiesterase                                                                      | 2         |
| response regulator receiver modulated diguanylate cyclase                                          | 2         |
| response regulator receiver modulated diguanylate cyclase/phosphodiesterase                        | 1         |
| response regulator receiver modulated diguanylate cyclase/phosphodiesterase with PAS/PAC sensor(s) | 2         |
| response regulator receiver modulated diguanylate phosphodiesterase                                | 1         |
| <b>PTS NTR Regulator</b>                                                                           | <b>2</b>  |
| HPr kinase                                                                                         | 1         |
| Phosphotransferase system, phosphocarrier protein HPr                                              | 1         |
| <b>Miscellaneous</b>                                                                               | <b>37</b> |
| (p)ppGpp synthetase I, SpoT/RelA                                                                   | 2         |
| N-acetylmuramyl-L-alanine amidase, negative regulator of AmpC, AmpD                                | 1         |
| Ppx/GppA phosphatase                                                                               | 1         |
| UTP-GlnB uridylyltransferase, GlnD                                                                 | 1         |
| UTP-glucose-1-phosphate uridylyltransferase GalU                                                   | 2         |
| bis(5'nucleosyl)-tetrphosphatase, ApaH                                                             | 1         |
| metal dependent phosphohydrolase                                                                   | 1         |
| nitrogen regulatory protein P-II                                                                   | 4         |
| phosphohistidine phosphatase, SixA                                                                 | 1         |
| polynucleotide adenylyltransferase/metal dependent phosphohydrolase                                | 1         |
| protein serine/threonine phosphatases                                                              | 1         |
| protein tyrosine phosphatase                                                                       | 1         |
| putative PAS/PAC sensor protein                                                                    | 1         |
| response regulator receiver modulated PAS/PAC sensor protein                                       | 1         |
| putative signal-transduction protein with CBS domains                                              | 2         |
| response regulator receiver protein                                                                | 13        |
| transcriptional regulator, TraR/DksA family                                                        | 2         |

**Supplemental Table 2.** Sensory Transduction and Regulatory Response Systems arranged by location.

| <b>gene #<br/>Nmul_A</b> | <b>response regulator<br/>receiver proteins</b>                                           | <b>gene #<br/>Nmul_A</b> | <b>histidine kinases</b>                                      | <b>Comment</b>                     |
|--------------------------|-------------------------------------------------------------------------------------------|--------------------------|---------------------------------------------------------------|------------------------------------|
| 0007                     | two component transcriptional regulator, Fis family                                       | 0008                     | integral membrane sensor signal transduction histidine kinase |                                    |
| 0163                     | response regulator receiver protein (CheY)                                                |                          |                                                               |                                    |
| 0238                     | two-component response regulator degradative enzyme and competence regulation NarL family |                          |                                                               |                                    |
| 0334                     | response regulator receiver modulated CheB methyltransferase                              | 0333                     | CheA signal transduction histidine kinases                    |                                    |
| 0335                     | response regulator receiver modulated diguanylate cyclase/phosphodiesterase               |                          |                                                               |                                    |
| 0389                     | two component, sigma54 specific, transcriptional regulator, Fis family                    | 0390                     | multi-sensor signal transduction histidine kinase             | Nitrogen assimilation ntrX         |
| 0542                     | response regulator receiver protein (CheY)                                                |                          |                                                               |                                    |
| 0543                     | response regulator receiver protein (CheY)                                                |                          |                                                               |                                    |
|                          |                                                                                           | 0553                     | histidine kinase                                              |                                    |
| 0706                     | two component transcriptional regulator, winged helix family                              | 0707                     | integral membrane sensor signal transduction histidine kinase | OmpR                               |
| 0728                     | two component transcriptional regulator, LuxR family                                      | 0727                     | putative signal transduction histidine kinase                 | NarL                               |
| 0823                     | response regulator receiver protein (CheY)                                                |                          |                                                               | PleD                               |
| 0826                     | response regulator receiver protein (CheY)                                                |                          |                                                               |                                    |
| 0827                     | pseudogene with frame shift GGDEF & EAL domains                                           |                          |                                                               |                                    |
| 0828                     | diguanylate cyclase/ phosphodiesterase (GGDEF & EAL domains) with PAS/PAC sensor(s)       |                          |                                                               |                                    |
| 0829                     | response regulator receiver protein (CheY)                                                |                          |                                                               |                                    |
| 0831                     | cyclic nucleotide-binding domain protein, regulatory subunit                              | 0832                     | histidine kinase                                              | Flanked by transposases IS4        |
|                          |                                                                                           | 1000                     | histidine kinase                                              | OmpR aerobic/anaerobic respiration |

|      |                                                                                                    |      |                                                               |                         |
|------|----------------------------------------------------------------------------------------------------|------|---------------------------------------------------------------|-------------------------|
| 1138 | response regulator receiver modulated diguanylate cyclase/phosphodiesterase with PAS/PAC sensor(s) |      |                                                               |                         |
| 1161 | two component, sigma54 specific, transcriptional regulator, Fis family                             | 1159 | integral membrane sensor signal transduction histidine kinase | NtrC                    |
|      |                                                                                                    | 1191 | integral membrane sensor hybrid histidine kinase              |                         |
| 1235 | two component transcriptional regulator, LuxR family                                               | 1236 | integral membrane sensor signal transduction histidine kinase | NarL                    |
| 1279 | response regulator receiver protein (CheY)                                                         |      |                                                               |                         |
|      |                                                                                                    | 1287 | multi-sensor signal transduction histidine kinase             |                         |
| 1288 | response regulator receiver protein (CheY)                                                         | 1289 | multi-sensor signal transduction histidine kinase             |                         |
|      |                                                                                                    | 1334 | Histidine kinase, dimerisation and phosphoacceptor region     |                         |
| 1336 | two component transcriptional regulator, LuxR family                                               | 1335 | putative signal transduction histidine kinase                 | Flagellar cluster, NarL |
|      |                                                                                                    | 1490 | PAS/PAC sensor hybrid histidine kinase                        | Dehydrogenase/reductase |
|      |                                                                                                    | 1491 | PAS/PAC sensor hybrid histidine kinase                        |                         |
|      |                                                                                                    | 1492 | PAS/PAC sensor hybrid histidine kinase                        |                         |
| 1555 | response regulator receiver modulated diguanylate phosphodiesterase                                | 1556 | multi-sensor hybrid histidine kinase                          |                         |
|      |                                                                                                    | 1636 | histidine kinase (pseudogene)                                 | transposase             |
| 1860 | response regulator receiver modulated diguanylate cyclase                                          |      |                                                               |                         |
| 1861 | response regulator receiver modulated PAS/PAC sensor protein                                       |      |                                                               |                         |
|      |                                                                                                    | 2015 | PAS/PAC sensor signal transduction histidine kinase           |                         |
| 2037 | response regulator receiver protein (CheY)                                                         |      |                                                               |                         |
|      |                                                                                                    | 2207 | multi-sensor hybrid histidine kinase                          |                         |
| 2231 | two component transcriptional regulator, winged helix family                                       | 2232 | PAS/PAC sensor signal transduction histidine kinase           | Pho regulon             |
| 2297 | response regulator receiver modulated diguanylate cyclase/phosphodiesterase with PAS/PAC sensor(s) |      |                                                               |                         |
| 2298 | response regulator receiver protein (CheY)                                                         | 2299 | PAS/PAC sensor signal transduction histidine kinase           |                         |

|      |                                                                        |      |                                                               |                                                    |
|------|------------------------------------------------------------------------|------|---------------------------------------------------------------|----------------------------------------------------|
| 2355 | response regulator receiver protein (CheY)                             |      |                                                               |                                                    |
| 2385 | response regulator receiver protein (CheY)                             |      |                                                               |                                                    |
| 2411 | response regulator receiver protein (CheY)                             | 2410 | integral membrane sensor signal transduction histidine kinase | OmpR                                               |
| 2671 | two component, sigma54 specific, transcriptional regulator, Fis family | 2672 | integral membrane sensor signal transduction histidine kinase | Outer membrane proteins, asparagine synthase, NtrC |
| 2674 | two component transcriptional regulator, LuxR family                   |      |                                                               | NarL                                               |
| 2675 | response regulator receiver protein (CheY)                             |      |                                                               |                                                    |
| 2693 | response regulator receiver modulated diguanylate cyclase              | 2694 | multi-sensor hybrid histidine kinase                          | PleD                                               |

**Supplemental Table 3.** Detail of transport and efflux as analyzed by COG categories, scores and probabilities. C=categories including: C, energy production and conversion; E, amino acid transport and metabolism; H, coenzyme transport; M, cell envelope biogenesis, outer membrane; N cell motility and secretion, O, posttranslational modification or chaperones; P, inorganic ion transport; Q, secondary metabolite transport and catabolism; R, general function prediction only; U, biopolymer transport V, defense mechanism.

| <b>ABC Transporters</b>                                                                               | <b>C</b> | <b>Locus Tag</b> | <b>COG</b> | <b>Score</b> | <b>P</b>  |
|-------------------------------------------------------------------------------------------------------|----------|------------------|------------|--------------|-----------|
| ABC-type (unclassified) transport system ATPase subunit                                               | R        | Nmul_A0085       | COG1137    | 392          | 1.00E-110 |
| ABC-type Fe <sup>3+</sup> -hydroxamate transport system periplasmic subunit                           | P        | Nmul_A0090       | COG0614    | 133          | 1.00E-32  |
| ABC-type sulfate transport system periplasmic subunit, pseudogene                                     | P        | Nmul_A0100       | COG1613    | 45.3         | 9.00E-07  |
| ABC-type antimicrobial peptide transport system ATPase subunit                                        | V        | Nmul_A0367       | COG1136    | 272          | 2.00E-74  |
| ABC-type transport system involved in lipoprotein release inner membrane subunit                      | M        | Nmul_A0369       | COG4591    | 167          | 1.00E-42  |
| ABC-type transport system involved in lipoprotein release inner membrane subunit                      | M        | Nmul_A0370       | COG4591    | 182          | 6.00E-47  |
| ABC-type phosphate transport system periplasmic subunit                                               | P        | Nmul_A0486       | COG0226    | 207          | 1.00E-54  |
| ABC-type sulfate/molybdate transport systems ATPase subunit                                           | P        | Nmul_A0503       | COG1118    | 413          | 1.00E-116 |
| ABC-type sulfate transport system inner membrane subunit                                              | P        | Nmul_A0504       | COG4208    | 398          | 1.00E-112 |
| ABC-type sulfate transport system inner membrane subunit                                              | O        | Nmul_A0505       | COG0555    | 267          | 5.00E-73  |
| ABC-type sulfate transport system periplasmic subunit                                                 | P        | Nmul_A0507       | COG1613    | 508          | 1.00E-145 |
| ABC-type uncharacterized transport system - periplasmic binding protein                               | N        | Nmul_A0583       | COG3225    | 61.5         | 1.00E-10  |
| ABC-type Na <sup>+</sup> efflux pump inner membrane subunit                                           | C        | Nmul_A0584       | COG1668    | 39           | 3.00E-04  |
| ABC-type multidrug transport system ATPase subunit                                                    | V        | Nmul_A0585       | COG1131    | 229          | 1.00E-61  |
| ABC-type multidrug transport system, fused ATPase and inner membrane subunits                         | V        | Nmul_A0629       | COG1132    | 332          | 4.00E-92  |
| ABC-type transport system involved in Fe-S cluster assembly, fused inner membrane and ATPase subunits | O        | Nmul_A0682       | COG5265    | 649          | 0         |
| ABC-type transport system involved in Fe-S cluster assembly inner membrane subunit                    | O        | Nmul_A0696       | COG0719    | 433          | 1.00E-122 |
| ABC-type transport system involved in Fe-S cluster assembly ATPase subunit                            | O        | Nmul_A0697       | COG0396    | 347          | 5.00E-97  |

|                                                                                                          |   |            |         |     |           |
|----------------------------------------------------------------------------------------------------------|---|------------|---------|-----|-----------|
| ABC-type transport system involved in Fe-S cluster assembly inner membrane subunit                       | O | Nmul_A0698 | COG0719 | 284 | 1.00E-77  |
| ABC-type spermidine/putrescine transport systems ATPase subunits                                         | E | Nmul_A0730 | COG3842 | 356 | 1.00E-99  |
| ABC-type Fe <sup>3+</sup> transport system inner membrane subunit                                        | P | Nmul_A0731 | COG1178 | 306 | 3.00E-84  |
| ABC-type Fe <sup>3+</sup> transport system periplasmic subunit                                           | P | Nmul_A0732 | COG1840 | 178 | 5.00E-46  |
| ABC-type cobalamin/Fe <sup>3+</sup> -siderophores transport systems ATPase subunits                      | P | Nmul_A0883 | COG1120 | 219 | 2.00E-58  |
| ATPase subunits of ABC transporters with duplicated ATPase domains                                       | R | Nmul_A0889 | COG0488 | 567 | 1.00E-163 |
| ABC-type transport system involved in lipoprotein release inner membrane subunit                         | M | Nmul_A0894 | COG4591 | 82  | 2.00E-16  |
| ABC-type antimicrobial peptide transport system ATPase subunit                                           | V | Nmul_A0895 | COG1136 | 243 | 6.00E-66  |
| ABC-type phosphate transport system periplasmic subunit                                                  | P | Nmul_A0897 | COG0226 | 206 | 2.00E-54  |
| Predicted ABC-type transport system involved in lysophospholipase L1 biosynthesis inner membrane subunit | Q | Nmul_A0948 | COG3127 | 639 | 0         |
| ABC-type antimicrobial peptide transport system ATPase subunit                                           | V | Nmul_A0951 | COG1136 | 282 | 2.00E-77  |
| ABC-type antimicrobial peptide transport system inner membrane subunit                                   | V | Nmul_A0953 | COG0577 | 115 | 5.00E-27  |
| ABC-type antimicrobial peptide transport system inner membrane subunit                                   | V | Nmul_A0954 | COG0577 | 122 | 3.00E-29  |
| spermidine/putrescine transport system substrate-binding protein (potD)                                  | E | Nmul_A0979 | COG0687 | 273 | 1.00E-74  |
| ABC-type spermidine/putrescine transport system inner membrane subunit II                                | E | Nmul_A0980 | COG1177 | 215 | 2.00E-57  |
| ABC-type spermidine/putrescine transport system inner membrane subunit I                                 | E | Nmul_A0981 | COG1176 | 231 | 4.00E-62  |
| ABC-type spermidine/putrescine transport systems ATPase subunits                                         | E | Nmul_A0982 | COG3842 | 392 | 1.00E-110 |
| ABC-type phosphate transport system inner membrane subunit                                               | P | Nmul_A1086 | COG0573 | 238 | 3.00E-64  |
| ABC-type phosphate transport system inner membrane subunit                                               | P | Nmul_A1087 | COG0581 | 224 | 5.00E-60  |
| ABC-type phosphate transport system ATPase subunit                                                       | P | Nmul_A1088 | COG1117 | 428 | 1.00E-121 |
| ABC-type bacteriocin/lantibiotic exporters, fused inner membrane and ATPase subunits                     | V | Nmul_A1174 | COG2274 | 258 | 1.00E-69  |
| ABC-type sulfate transport system periplasmic subunit                                                    | P | Nmul_A1192 | COG1613 | 380 | 1.00E-107 |



|                                                                                             |   |            |         |      |           |
|---------------------------------------------------------------------------------------------|---|------------|---------|------|-----------|
| ABC-type transport system involved in cytochrome c biogenesis inner membrane subunit        | O | Nmul_A1212 | COG0755 | 134  | 7.00E-33  |
| ABC-type transport system involved in cytochrome c biogenesis inner membrane subunit        | O | Nmul_A1216 | COG2386 | 156  | 1.00E-39  |
| ABC-type transport system involved in cytochrome c biogenesis (heme) ATPase subunit         | O | Nmul_A1217 | COG4133 | 199  | 1.00E-52  |
| ABC-type Mn <sup>2+</sup> /Zn <sup>2+</sup> transport systems inner membrane subunits       | P | Nmul_A1230 | COG1108 | 177  | 1.00E-45  |
| ABC-type Mn/Zn transport systems ATPase subunit                                             | P | Nmul_A1231 | COG1121 | 237  | 5.00E-64  |
| ABC-type metal ion transport system periplasmic subunit/surface adhesin                     | P | Nmul_A1232 | COG0803 | 218  | 5.00E-58  |
| ABC-type protease/lipase transport system, fused ATPase and inner membrane subunits         | R | Nmul_A1280 | COG4618 | 706  | 0         |
| ABC-type multidrug transport system inner membrane subunit                                  | V | Nmul_A1419 | COG0842 | 88   | 9.00E-19  |
| ABC-type multidrug transport system inner membrane subunit                                  | V | Nmul_A1420 | COG0842 | 92.3 | 6.00E-20  |
| ABC-type multidrug transport system ATPase subunit                                          | V | Nmul_A1421 | COG1131 | 253  | 3.00E-68  |
| ABC-type multidrug transport system ATPase , fused inner membrane subunits                  | V | Nmul_A1487 | COG1132 | 381  | 1.00E-107 |
| ABC-type antimicrobial peptide transport system ATPase subunit                              | V | Nmul_A1504 | COG1136 | 240  | 9.00E-65  |
| ABC-type transport system involved in lipoprotein, release inner membrane subunit           | M | Nmul_A1505 | COG4591 | 61.4 | 1.00E-10  |
| ABC-type branched-chain amino acid transport systems periplasmic subunit                    | E | Nmul_A1557 | COG0683 | 195  | 5.00E-51  |
| ABC-type uncharacterized transport system auxiliary subunit                                 | R | Nmul_A1609 | COG3218 | 116  | 1.00E-27  |
| ABC-type transport system involved in resistance to organic solvents periplasmic subunit    | Q | Nmul_A1610 | COG1463 | 125  | 6.00E-30  |
| ABC-type transport system involved in resistance to organic solvents ATPase subunit         | Q | Nmul_A1611 | COG1127 | 339  | 1.00E-94  |
| ABC-type transport system involved in resistance to organic solvents inner membrane subunit | Q | Nmul_A1612 | COG0767 | 221  | 5.00E-59  |
| ABC-type multidrug transport system, fused ATPase inner membrane subunits                   | V | Nmul_A1740 | COG1132 | 407  | 1.00E-114 |
| ATPase subunits of ABC transporters with duplicated ATPase domains                          | R | Nmul_A1811 | COG0488 | 575  | 1.00E-165 |
| ABC-type siderophore export system, fused ATPase inner membrane subunits                    | P | Nmul_A1823 | COG4615 | 355  | 5.00E-99  |
| ABC-type phosphate transport system periplasmic subunit                                     | P | Nmul_A1955 | COG0226 | 38.5 | 2.00E-04  |

|                                                                                                  |   |            |         |      |           |
|--------------------------------------------------------------------------------------------------|---|------------|---------|------|-----------|
| Predicted ABC-type transport system involved in lysophospholipase L1 biosynthesis ATPase subunit | Q | Nmul_A1972 | COG4181 | 279  | 1.00E-76  |
| ABC-type transport system involved in resistance to organic solvents inner membrane subunit      | Q | Nmul_A1981 | COG0767 | 206  | 2.00E-54  |
| ABC-type transport system involved in resistance to organic solvents ATPase subunit              | Q | Nmul_A1982 | COG1127 | 302  | 1.00E-83  |
| ABC-type transport system involved in resistance to organic solvents periplasmic subunit         | Q | Nmul_A1983 | COG1463 | 118  | 6.00E-28  |
| ABC-type uncharacterized transport system auxiliary subunit                                      | R | Nmul_A1984 | COG3218 | 70   | 1.00E-13  |
| ABC-type sulfate transport system periplasmic subunit                                            | P | Nmul_A2032 | COG1613 | 339  | 2.00E-94  |
| ABC-type uncharacterized transport system inner membrane subunit                                 | R | Nmul_A2133 | COG4137 | 194  | 6.00E-51  |
| ABC-type polysaccharide/polyol phosphate transport system ATPase subunit                         | M | Nmul_A2200 | COG1134 | 286  | 2.00E-78  |
| ABC-type multidrug transport system, fused ATPase and inner membrane subunits                    | V | Nmul_A2254 | COG1132 | 498  | 1.00E-141 |
| ABC-type dipeptide/oligopeptide/nickel transport system ATPase subunit                           | P | Nmul_A2331 | COG0444 | 411  | 1.00E-116 |
| ABC-type dipeptide/oligopeptide/nickel transport systems inner membrane subunits                 | P | Nmul_A2332 | COG1173 | 176  | 2.00E-45  |
| ABC-type dipeptide/oligopeptide/nickel transport systems inner membrane subunits                 | P | Nmul_A2333 | COG0601 | 182  | 4.00E-47  |
| ABC-type dipeptide transport system periplasmic subunit                                          | E | Nmul_A2334 | COG0747 | 139  | 6.00E-34  |
| ABC-type polysaccharide/polyol phosphate export systems inner membrane subunit                   | M | Nmul_A2397 | COG1682 | 147  | 7.00E-37  |
| ABC-type polysaccharide/polyol phosphate transport system ATPase subunit                         | M | Nmul_A2398 | COG1134 | 294  | 1.00E-80  |
| ABC-type antimicrobial peptide transport system ATPase subunit                                   | V | Nmul_A2508 | COG1136 | 273  | 5.00E-75  |
| ABC-type transport system involved in lipoprotein release inner membrane subunit                 | M | Nmul_A2509 | COG4591 | 391  | 1.00E-110 |
| ABC-type transport system involved in resistance to organic solvents auxiliary subunit           | Q | Nmul_A2559 | COG2854 | 88   | 7.00E-19  |
| ABC-type Fe <sup>3+</sup> -siderophore transport system inner membrane subunit                   | P | Nmul_A2614 | COG0609 | 166  | 1.00E-42  |
| ATPase subunits of ABC transporters with duplicated ATPase domains                               | R | Nmul_A2700 | COG0488 | 537  | 1.00E-153 |
| ABC-type polysaccharide/polyol phosphate export systems inner membrane subunit                   | M | Nmul_A2743 | COG1682 | 57.1 | 1.00E-09  |
| ABC-type multidrug transport system ATPase subunit                                               | V | Nmul_A2744 | COG1131 | 260  | 1.00E-70  |

|                                                                                             |   |            |         |     |           |
|---------------------------------------------------------------------------------------------|---|------------|---------|-----|-----------|
| ABC-type transport system involved in resistance to organic solvents auxiliary subunit      | Q | Nmul_A2746 | COG2854 | 154 | 4.00E-39  |
| ABC-type transport system involved in resistance to organic solvents periplasmic subunit    | Q | Nmul_A2747 | COG1463 | 114 | 4.00E-27  |
| ABC-type transport system involved in resistance to organic solvents inner membrane subunit | Q | Nmul_A2748 | COG0767 | 234 | 5.00E-63  |
| ABC-type transport system involved in resistance to organic solvents ATPase subunit         | Q | Nmul_A2749 | COG1127 | 342 | 2.00E-95  |
|                                                                                             |   |            |         |     |           |
| <b>P-Type ATPase</b>                                                                        |   |            |         |     |           |
| Cation transport ATPase                                                                     | P | Nmul_A0037 | COG0474 | 690 | 0         |
| Cation transport ATPase                                                                     | P | Nmul_A1528 | COG0474 | 779 | 0         |
| Cation transport ATPase                                                                     | P | Nmul_A1648 | COG0474 | 579 | 1.00E-166 |
| Cation transport ATPase                                                                     | P | Nmul_A2005 | COG2217 | 705 | 0         |
| Cation transport ATPase                                                                     | P | Nmul_A2276 | COG2217 | 750 | 0         |
| <b>TonB/ExbB/ExbD or TolA/TolQ/TolR</b>                                                     |   |            |         |     |           |
| Biopolymer transport protein ExbD/TolR                                                      | U | Nmul_A1028 | COG0848 | 106 | 8.00E-25  |
| Biopolymer transport protein ExbD/TolR                                                      | U | Nmul_A1047 | COG0848 | 128 | 2.00E-31  |
| Biopolymer transport protein ExbD/TolR                                                      | U | Nmul_A2301 | COG0848 | 81  | 2.00E-17  |
| Biopolymer transport protein ExbD/TolR                                                      | U | Nmul_A2569 | COG0848 | 105 | 1.00E-24  |
| Biopolymer transport protein ExbD/TolR                                                      | U | Nmul_A2716 | COG0848 | 111 | 2.00E-26  |
| MotA/TolQ/ExbB proton channel                                                               | U | Nmul_A1029 | COG0811 | 135 | 2.00E-33  |
| MotA/TolQ/ExbB proton channel                                                               | U | Nmul_A1048 | COG0811 | 146 | 1.00E-36  |
| MotA/TolQ/ExbB proton channel                                                               | U | Nmul_A2300 | COG0811 | 106 | 1.00E-24  |
| MotA/TolQ/ExbB proton channel                                                               | U | Nmul_A2570 | COG0811 | 117 | 3.00E-27  |
| MotA/TolQ/ExbB proton channel                                                               | U | Nmul_A2717 | COG0811 | 187 | 4.00E-49  |
| TonB protein                                                                                | M | Nmul_A0537 | COG0810 | 46  | 6.00E-06  |
| TonB protein                                                                                | M | Nmul_A1049 | COG0810 | 53  | 2.00E-08  |
| TolA protein                                                                                | A | Nmul_A2715 | COG3064 | 50  | 3.00E-07  |
| Tol-pal system protein YbgF                                                                 | S | Nmul_A2712 | COG1729 | 128 | 4.00E-31  |
| peptidoglycan-associated lipoprotein                                                        | M | Nmul_A2713 | COG2885 | 122 | 1.00E-29  |
| Tol-Pal system beta propeller repeat protein TolB                                           | U | Nmul_A2714 | COG0823 | 308 | 7.00E-85  |
| <b>Ton B dependent receptors</b>                                                            |   |            |         |     |           |
| Outer membrane receptor for monomeric catechols                                             | P | Nmul_A1260 | COG4774 | 314 | 2.00E-86  |
| Outer membrane receptor for monomeric catechols                                             | P | Nmul_A2391 | COG4774 | 221 | 2.00E-58  |
| ferrichrome iron receptor KO: K02014 iron complex outermembrane receptor protein            | H | Nmul_A0628 | COG4206 | 162 | 9.00E-42  |

|                                                            |   |            |         |      |           |
|------------------------------------------------------------|---|------------|---------|------|-----------|
| Outer membrane receptor proteins mostly Fe transport       | P | Nmul_A0635 | COG1629 | 105  | 2.00E-23  |
| Outer membrane receptor proteins mostly Fe transport       | P | Nmul_A1233 | COG1629 | 73.4 | 5.00E-14  |
| Outer membrane receptor proteins mostly Fe transport       | P | Nmul_A1426 | COG1629 | 150  | 2.00E-37  |
| Outer membrane receptor proteins mostly Fe transport       | P | Nmul_A1826 | COG1629 | 224  | 1.00E-59  |
| Outer membrane hemin receptor TonB cobalamin               | H | Nmul_A0973 | COG4206 | 94   | 2.00E-20  |
| Outer membrane cobalamin receptor protein                  |   | Nmul_A2510 | COG4206 | 125  | 8.00E-30  |
| <b>RND - efflux</b>                                        |   |            |         |      |           |
| Cation/multidrug efflux pump                               | V | Nmul_A0043 | COG0841 | 951  | 0         |
| Cation/multidrug efflux pump                               | V | Nmul_A0688 | COG0841 | 985  | 0         |
| Cation/multidrug efflux pump                               | V | Nmul_A0691 | COG0841 | 969  | 0         |
| Cation/multidrug efflux pump                               | V | Nmul_A0850 | COG0841 | 912  | 0         |
| Cation/multidrug efflux pump                               | V | Nmul_A1727 | COG0841 | 827  | 0         |
| Cation/multidrug efflux pump                               | V | Nmul_A1842 | COG0841 | 500  | 1.00E-142 |
| Cation/multidrug efflux pump                               | V | Nmul_A1970 | COG0841 | 891  | 0         |
| Predicted exporters of the RND superfamily                 | R | Nmul_A1652 | COG1033 | 113  | 7.00E-26  |
| Predicted exporters of the RND superfamily                 | R | Nmul_A2558 | COG1033 | 103  | 8.00E-23  |
| Putative silver efflux pump                                | P | Nmul_A1113 | COG3696 | 1125 | 0         |
| Putative silver efflux pump                                | P | Nmul_A1406 | COG3696 | 1121 | 0         |
| Putative silver efflux pump                                | P | Nmul_A1639 | COG3696 | 1008 | 0         |
| Putative silver efflux pump                                | P | Nmul_A2108 | COG3696 | 1211 | 0         |
| <b>DMT efflux superfamily</b>                              |   |            |         |      |           |
| Small multidrug resistance protein                         | P | Nmul_A0642 | COG2076 | 45.1 | 1.00E-06  |
| Drug/metabolite exporter, DME family                       |   | Nmul_A1849 | COG2962 | 48   | 1.00E-06  |
| Predicted permease DMT superfamily                         | R | Nmul_A2637 | COG5006 | 219  | 3.00E-58  |
| Small multidrug resistance protein                         |   | Nmul_A0286 |         |      |           |
| <b>Efflux accessory proteins, membrane fusion proteins</b> |   |            |         |      |           |
| Membrane-fusion protein, HlyD subfamily                    | V | Nmul_A0950 | COG1566 | 102  | 5.00E-23  |
| Membrane-fusion protein, HlyD subfamily                    | V | Nmul_A1281 | COG1566 | 56.5 | 4.00E-09  |
| Membrane-fusion protein, HlyD subfamily                    | V | Nmul_A1422 | COG1566 | 117  | 1.00E-27  |
| Membrane-fusion protein, HlyD subfamily                    | V | Nmul_A1503 | COG1566 | 77   | 2.00E-15  |
| RND efflux system, membrane-fusion protein                 | M | Nmul_A0042 | COG0845 | 131  | 1.00E-31  |
| RND efflux system, membrane-fusion protein                 | M | Nmul_A0689 | COG0845 | 156  | 4.00E-39  |
| RND efflux system, membrane-fusion protein                 | M | Nmul_A0692 | COG0845 | 136  | 2.00E-33  |
| RND efflux system, membrane-fusion protein                 | M | Nmul_A0849 | COG0845 | 142  | 6.00E-35  |
| RND efflux system, membrane-fusion protein                 | M | Nmul_A1640 | COG0845 | 112  | 5.00E-26  |

|                                                           |   |            |         |      |          |
|-----------------------------------------------------------|---|------------|---------|------|----------|
| RND efflux system, membrane-fusion protein                | M | Nmul_A1728 | COG0845 | 113  | 2.00E-26 |
| RND efflux system, membrane-fusion protein                | M | Nmul_A1971 | COG0845 | 117  | 1.00E-27 |
| RND efflux system, membrane-fusion protein                | M | Nmul_A2107 | COG0845 | 90   | 4.00E-19 |
| RND efflux system, membrane-fusion protein                | M | Nmul_A1112 | COG0845 | 87   | 2.00E-18 |
| <b>Efflux accessory proteins, outer membrane proteins</b> |   |            |         |      |          |
| RND efflux system, outer membrane lipoprotein, NodT       | M | Nmul_A0690 | COG1538 | 238  | 6.00E-64 |
| RND efflux system, outer membrane lipoprotein, NodT       | M | Nmul_A0851 | COG1538 | 259  | 4.00E-70 |
| RND efflux system, outer membrane lipoprotein, NodT       | M | Nmul_A1502 | COG1538 | 227  | 2.00E-60 |
| RND efflux system, outer membrane lipoprotein, NodT       | M | Nmul_A1726 | COG1538 | 184  | 2.00E-47 |
| RND efflux system, outer membrane lipoprotein, NodT       | M | Nmul_A1840 | COG1538 | 199  | 3.00E-52 |
| outer membrane efflux channel                             | M | Nmul_A1408 | COG1538 | 134  | 2.00E-32 |
| outer membrane efflux channel                             | M | Nmul_A1641 | COG1538 | 126  | 4.00E-30 |
| outer membrane efflux channel                             | M | Nmul_A2106 | COG1538 | 142  | 4.00E-35 |
| outer membrane efflux channel                             | M | Nmul_A1282 | COG1538 | 166  | 4.00E-42 |
| type I secretion outer membrane protein, TolC             | M | Nmul_A2283 | COG1538 | 170  | 2.00E-43 |
| <b>Predicted Permeases</b>                                |   |            |         |      |          |
| Predicted permeases                                       | R | Nmul_A0402 | COG0795 | 143  | 2.00E-35 |
| Predicted permeases                                       | R | Nmul_A0403 | COG0795 | 133  | 3.00E-32 |
| Ammonia permease                                          | P | Nmul_A0516 | COG0004 | 107  | 1.00E-24 |
| Predicted permeases                                       | R | Nmul_A0613 | COG0730 | 63.1 | 2.00E-11 |
| Sulfate permease and related transporters                 | P | Nmul_A0710 | COG0659 | 244  | 2.00E-65 |
| Predicted permease                                        | R | Nmul_A0737 | COG0628 | 128  | 4.00E-31 |
| Amino acid transporters                                   | E | Nmul_A0940 | COG0531 | 116  | 5.00E-27 |
| Amino acid transporters                                   | E | Nmul_A1252 | COG0531 | 144  | 1.00E-35 |
| Predicted permease                                        | R | Nmul_A1509 | COG0628 | 129  | 4.00E-31 |
| Predicted permeases                                       | R | Nmul_A1681 | COG0730 | 49.6 | 2.00E-07 |
| Tellurite resistance protein and related permeases        | P | Nmul_A2613 | COG1275 | 46.8 | 3.00E-06 |
| Predicted permease                                        | R | Nmul_A2644 | COG0628 | 138  | 5.00E-34 |
| Predicted permeases                                       | R | Nmul_A2681 | COG0730 | 77.7 | 1.00E-15 |
| <b>Outer membrane proteins / Porins</b>                   |   |            |         |      |          |
| Phosphate-selective porin                                 | P | Nmul_A0898 | COG3746 | 174  | 2.00E-44 |
| Phosphate-selective porin                                 | P | Nmul_A1267 | COG3746 | 128  | 7.00E-31 |

|                                                                        |   |            |         |     |           |
|------------------------------------------------------------------------|---|------------|---------|-----|-----------|
| Phosphate-selective porin                                              | P | Nmul_A2678 | COG3746 | 163 | 4.00E-41  |
| Carbohydrate-selective porin                                           | M | Nmul_A2120 | COG3659 | 41  | 3.00E-04  |
| Porin, OmpC family                                                     | M | Nmul_A2561 | COG3203 | 85  | 7.00E-18  |
| Polysaccharide export protein                                          | M | Nmul_A0242 | COG1596 | 107 | 1.00E-24  |
| Polysaccharide export protein                                          | M | Nmul_A2529 | COG1596 | 93  | 2.00E-20  |
| polypeptide-transport-associated, ShlB-type                            | U | Nmul_A2576 | COG2831 | 194 | 2.00E-50  |
| surface antigen D15                                                    | M | Nmul_A0665 | COG4775 | 693 | 0         |
| NlpBDapX family lipoprotein                                            | M | Nmul_A1539 | COG3317 | 225 | 4.00E-60  |
| rare lipoprotein B                                                     | M | Nmul_A0512 | COG2980 | 108 | 2.00E-25  |
| organic solvent tolerance protein                                      | M | Nmul_A0521 | COG1452 | 388 | 1.00E-108 |
| outer membrane lipoprotein LolB                                        | M | Nmul_A0587 | COG3017 | 109 | 2.00E-25  |
| outer membrane lipoprotein carrier protein LolA                        | M | Nmul_A0178 | COG2834 | 139 | 1.00E-34  |
| <b>CDF</b>                                                             |   |            |         |     |           |
| Co/Zn/Cd efflux system subunit                                         | P | Nmul_A1744 | COG1230 | 262 | 4.00E-71  |
| <b>FNT</b>                                                             |   |            |         |     |           |
| Formate/nitrite family of transporters                                 | P | Nmul_A2663 | COG2116 | 164 | 8.00E-42  |
| <b>Trk</b>                                                             |   |            |         |     |           |
| Kef-type K <sup>+</sup> transport system predicted NAD-binding subunit | P | Nmul_A1156 | COG4651 | 423 | 1.00E-119 |
| Kef-type K <sup>+</sup> transport systems membrane subunits            | P | Nmul_A1547 | COG0475 | 73  | 4.00E-14  |
| K <sup>+</sup> transporter                                             | P | Nmul_A0201 | COG3158 | 774 | 0         |
| Predicted flavoprotein involved in K <sup>+</sup> transport            | P | Nmul_A1368 | COG2072 | 211 | 6.00E-56  |
| <b>Mechanosensitive Ion Channels</b>                                   |   |            |         |     |           |
| Small-conductance mechanosensitive channel                             | M | Nmul_A1514 | COG3264 | 117 | 4.00E-27  |
| Small-conductance mechanosensitive channel                             | M | Nmul_A2622 | COG3264 | 178 | 4.00E-46  |
| <b>Possible Ion Channels</b>                                           |   |            |         |     |           |
| K <sup>+</sup> Ion channel                                             | P | Nmul_A0076 | COG1226 | 37  | .002      |
| Ion channel                                                            |   | Nmul_A1615 |         |     |           |
| K <sup>+</sup> Ion channel                                             | P | Nmul_A1690 | COG1226 |     | 0.002     |
| Ion channel pore region                                                |   | Nmul_A1691 |         |     |           |
| <b>TerC</b>                                                            |   |            |         |     |           |
| Membrane protein TerC possibly involved in tellurium resistance        | P | Nmul_A1926 | COG0861 | 199 | 2.00E-52  |
| Membrane protein TerC possibly involved in tellurium resistance        | P | Nmul_A2473 | COG0861 | 130 | 1.00E-31  |
| <b>Mg<sup>2+</sup>/Co<sup>2+</sup> Transporters</b>                    |   |            |         |     |           |
| Mg <sup>2+</sup> and Co <sup>2+</sup> transporters, CorA               | P | Nmul_A0433 | COG0598 | 258 | 4.00E-70  |

|                                                                 |   |            |         |      |           |
|-----------------------------------------------------------------|---|------------|---------|------|-----------|
| Mg <sup>2+</sup> and Co <sup>2+</sup> transporters, CorA        | P | Nmul_A0576 | COG0598 | 145  | 4.00E-36  |
| Mg/Co/Ni transporter MgtE (contains CBS domain)                 | P | Nmul_A0540 | COG2239 | 396  | 1.00E-111 |
| Putative Mg <sup>2+</sup> and Co <sup>2+</sup> transporter CorB | P | Nmul_A2132 | COG4536 | 458  | 1.00E-130 |
| Putative Mg <sup>2+</sup> and Co <sup>2+</sup> transporter CorC | P | Nmul_A2698 | COG4535 | 336  | 8.00E-94  |
| <b>Nha</b>                                                      |   |            |         |      |           |
| Na <sup>+</sup> /H <sup>+</sup> antiporter                      | P | Nmul_A1537 | COG3004 | 333  | 2.00E-92  |
| <b>Symporter</b>                                                |   |            |         |      |           |
| Na <sup>+</sup> -dependent symporter                            | R | Nmul_A1633 | COG0385 | 203  | 1.00E-53  |
| Divalent anion symporter                                        | P | Nmul_A1105 | COG1055 | 81.4 | 1.00E-16  |
| Na <sup>+</sup> :dicarboxylate symporter                        | C | Nmul_A0633 | COG1301 | 277  | 8.00E-76  |
| <b>Antiporters - MOP family efflux flippases</b>                |   |            |         |      |           |
| Polysaccharide biosynthesis efflux pump                         | R | Nmul_A0292 | COG2244 | 62   | 9.00E-11  |
| MviN family protein                                             | R | Nmul_A1036 | COG0728 | 427  | 1.00E-121 |
| Polysaccharide biosynthesis efflux pump                         | R | Nmul_A0248 | COG2244 | 50   | 3.00E-7   |
| <b>MFS</b>                                                      |   |            |         |      |           |
| Nitrate/nitrite transporter                                     | P | Nmul_A0026 | COG2223 | 53.7 | 2.00E-08  |
| Major facilitator superfamily transporter                       | G | Nmul_A0223 |         |      |           |
| Major facilitator superfamily transporter                       | G | Nmul_A0899 |         |      |           |
| MFS efflux pump                                                 | G | Nmul_A0966 | COG2814 | 67   | 3.00E-12  |
| MFS efflux pump                                                 | G | Nmul_A1807 | COG2814 | 77.5 | 2.00E-15  |
| MFS efflux pump                                                 | G | Nmul_A1922 | COG2814 | 41   | 1.00E-04  |
| MFS efflux pump                                                 | G | Nmul_A2103 | COG2814 | 41.7 | 9.00E-05  |
| MFS efflux pump                                                 | G | Nmul_A2116 | COG2814 | 35.6 | 0.006     |
| MFS efflux pump                                                 | G | Nmul_A2228 | COG2814 | 87   | 3.00E-18  |
| Major facilitator superfamily transporter                       | R | Nmul_A2758 | COG2270 | 195  | 5.00E-51  |
| <b>ZIP - Zinc</b>                                               |   |            |         |      |           |
| Predicted divalent heavy-metal cations transporter              | P | Nmul_A1978 | COG0428 | 104  | 8.00E-24  |
| <b>CopD</b>                                                     |   |            |         |      |           |
| Putative copper export protein                                  | P | Nmul_A2320 | COG1276 | 71   | 2.00E-13  |
| Putative copper export protein                                  | P | Nmul_A2760 | COG1276 | 71.5 | 2.00E-13  |
| <b>Urea</b>                                                     |   |            |         |      |           |
| Urea transporter                                                | E | Nmul_A1245 | COG4413 | 186  | 2.00E-48  |
| <b>Phosphotransferase</b>                                       |   |            |         |      |           |
| Phosphotransferase system mannose/fructose-specific subunit IIA | G | Nmul_A0218 | COG2893 | 99.6 | 6.00E-23  |

|                                                                                 |   |            |         |      |           |
|---------------------------------------------------------------------------------|---|------------|---------|------|-----------|
| Phosphotransferase system HPr-related proteins                                  | G | Nmul_A0219 | COG1925 | 96.8 | 3.00E-22  |
| Phosphoenolpyruvate-protein kinase (PTS system EI subunit in bacteria)          | G | Nmul_A0220 | COG1080 | 614  | 1.00E-177 |
| <b>Type II Secretion</b>                                                        |   |            |         |      |           |
| Type II secretory pathway subunit ExeA (predicted ATPase)                       | U | Nmul_A0215 | COG3267 | 128  | 1.00E-158 |
| Type II secretory pathway subunit PulM                                          | U | Nmul_A1892 | COG3149 | 58   | 2.00E-84  |
| Type II secretory pathway subunit PulL                                          | U | Nmul_A1893 | COG3297 | 64   | 2.00E-84  |
| Type II secretory pathway subunit PulK                                          | U | Nmul_A1894 | COG3156 | 170  | 2.00E-47  |
| Type II secretory pathway subunit PulJ                                          | U | Nmul_A1895 | COG4795 | 53   | 2.00E-47  |
| Type II secretory pathway pseudopilin PulG                                      | U | Nmul_A1896 | COG2165 | 49   | 7.00E-79  |
| Type II secretory pathway pseudopilin PulG                                      | U | Nmul_A1897 | COG2165 | 44   | 3.00E-92  |
| Type II secretory pathway pseudopilin PulG                                      | U | Nmul_A1898 | COG2165 | 94   | 7.00E-79  |
| general secretion pathway protein C                                             |   | Nmul_A1901 | none    | 31   | 4.00E-12  |
| Type II secretory pathway subunit PulD                                          | U | Nmul_A1902 | COG1450 | 307  | 5.00E-36  |
| Type II secretory pathway ATPase Pule/Tfp pilus assembly pathway ATPase PilB    | U | Nmul_A1903 | COG2804 | 552  | 1.00E-158 |
| Type II secretory pathway subunit PulF                                          | U | Nmul_A1904 | COG1459 | 332  | 2.00E-30  |
| Type II secretory pathway prepilin signal peptidase PulO and related peptidases | U | Nmul_A2131 | COG1989 | 147  | 3.00E-92  |
| Flp pilus assembly protein ATPase CpaF                                          | U | Nmul_A2354 | COG4962 | 405  | 1.00E-114 |
| Flp pilus assembly protein ATPase CpaE                                          | U | Nmul_A2355 | COG4963 | 172  | 3.00E-44  |
| Flp pilus assembly protein secretin CpaC                                        | U | Nmul_A2360 | COG4964 | 283  | 2.00E-77  |
| Flp pilus assembly protein CpaB                                                 | U | Nmul_A2361 | COG3745 | 135  | 4.00E-33  |
| Flp pilus assembly protein protease CpaA                                        | U | Nmul_A2362 | COG4960 | 51   | 6.00E-08  |
| Flp pilus assembly protein pilin Flp                                            | U | Nmul_A2363 | COG3847 | 46   | 4.00E-07  |
| Tfp pilus assembly protein major pilin Pila                                     | U | Nmul_A2475 | COG4969 | 54   | 6.00E-09  |
| Type II secretory pathway subunit ExeA (predicted ATPase)                       | U | Nmul_A2525 | COG3267 | 145  | 1.00E-136 |
| Type II secretory pathway pseudopilin PulG                                      | U | Nmul_A2580 | COG2165 | 49   | 2.00E-08  |
| Tfp pilus assembly protein Pile                                                 | U | Nmul_A2581 | COG4968 | 59   | 2.00E-10  |
| Type II secretory pathway pseudopilin PulG                                      | U | Nmul_A2582 | COG2165 | 62   | 2.00E-08  |
| Type II secretory pathway subunit HofQ                                          | U | Nmul_A2583 | COG4796 | 184  | 2.00E-30  |
| Type II secretory pathway ATPase Pule/Tfp pilus assembly pathway ATPase PilB    | U | Nmul_A2588 | COG2804 | 478  | 1.00E-136 |
| Type II secretory pathway subunit PulF                                          | U | Nmul_A2589 | COG1459 | 287  | 5.00E-36  |
| Type II secretory pathway pseudopilin PulG                                      | U | Nmul_A2590 | COG2165 | 89   | 9.00E-44  |
|                                                                                 |   |            |         |      |           |



| <b>Type III Secretion</b>                                                     |   |            |         |      |           |
|-------------------------------------------------------------------------------|---|------------|---------|------|-----------|
| Flagellar biosynthesis pathway subunit FlhB                                   | U | Nmul_A1309 | COG1377 | 397  | 1.00E-112 |
| Flagellar biosynthesis pathway subunit FlhA                                   | U | Nmul_A1310 | COG1298 | 849  | 0         |
| Flagellar biosynthesis/type III secretory pathway chaperone                   | N | Nmul_A1316 | COG3418 | 40   | 6.00E-05  |
| Flagellar biosynthesis/type III secretory pathway lipoprotein                 | U | Nmul_A1345 | COG1766 | 414  | 1.00E-117 |
| Flagellar biosynthesis/type III secretory pathway protein                     | U | Nmul_A1347 | COG1317 | 95.8 | 2.00E-21  |
| Flagellar biosynthesis/type III secretory pathway ATPase                      | U | Nmul_A1348 | COG1157 | 588  | 1.00E-169 |
| Flagellar motor switch/type III secretory pathway protein                     | U | Nmul_A1353 | COG1886 | 95.5 | 2.00E-21  |
| Flagellar biosynthesis pathway, FliO                                          |   | Nmul_A1354 | COG3190 | 76   | 1.00E-15  |
| Flagellar biosynthesis pathway subunit FliP                                   | U | Nmul_A1355 | COG1338 | 287  | 5.00E-79  |
| Flagellar biosynthesis pathway subunit FliQ                                   | U | Nmul_A1356 | COG1987 | 82   | 4.00E-18  |
| Flagellar biosynthesis pathway subunit FliR                                   | U | Nmul_A1357 | COG1684 | 169  | 2.00E-43  |
| <b>Type IV Secretion</b>                                                      |   |            |         |      |           |
| Type IV secretory pathway VirD4 subunit                                       | U | Nmul_C2793 | COG3505 | 222  | 4.00E-59  |
| predicted amidophosphoribosyltransferases KO: K02242 competence protein ComFC | R | Nmul_A1128 | COG1040 | 157  | 1.00E-39  |
| DNA uptake protein and related DNA-binding proteins                           | L | Nmul_A1771 | COG1555 | 68   | 2.00E-13  |
| putative DNA-binding protein KO: K02237 competence protein ComEA              | L | Nmul_A2222 | COG1555 | 84   | 3.00E-18  |
| related to ComE operon protein 3 KO: K02238 competence protein ComEC          | R | Nmul_A2506 | COG2333 | 224  | 1.00E-59  |
| <b>Sec-Dependent Translocase</b>                                              |   |            |         |      |           |
| Preprotein translocase subunit SecE                                           | U | Nmul_A0753 | COG0690 | 52   | 1.00E-08  |
| Preprotein translocase subunit SecY                                           | U | Nmul_A0787 | COG0201 | 461  | 1.00E-131 |
| Preprotein translocase subunit SecA (ATPase RNA helicase)                     | U | Nmul_A0924 | COG0653 | 522  | 1.00E-149 |
| Preprotein translocase subunit SecG                                           | U | Nmul_A1090 | COG1314 | 75   | 1.00E-15  |
| Preprotein translocase subunit SecB                                           | U | Nmul_A1124 | COG1952 | 166  | 9.00E-43  |
| Signal peptidase I                                                            | U | Nmul_A1752 | COG0681 | 64   | 9.00E-12  |
| Signal recognition particle GTPase                                            | U | Nmul_A2134 | COG0541 | 584  | 1.00E-168 |
| Preprotein translocase subunit SecF                                           | U | Nmul_A2426 | COG0341 | 299  | 2.00E-82  |
| Preprotein translocase subunit SecD                                           | U | Nmul_A2427 | COG0342 | 482  | 1.00E-137 |
| Preprotein translocase subunit YajC                                           | U | Nmul_A2428 | COG1862 | 49   | 5.00E-08  |
| Preprotein translocase subunit SecA (ATPase RNA helicase)                     | U | Nmul_A2485 | COG0653 | 1095 | 0         |

|                                                         |   |            |         |     |           |
|---------------------------------------------------------|---|------------|---------|-----|-----------|
| Lipoprotein signal peptidase                            | U | Nmul_A2655 | COG0597 | 122 | 2.00E-29  |
| Signal recognition particle GTPase                      | U | Nmul_A2738 | COG0552 | 371 | 1.00E-104 |
| Preprotein translocase subunit YidC                     | U | Nmul_A2776 | COG0706 | 256 | 3.00E-69  |
| <b>Twin-arginine protein translocation (Tat) system</b> |   |            |         |     |           |
| Twin-arginine protein translocation, subunit TatC       | U | Nmul_A0808 | COG0805 | 221 | 3.00E-59  |
| Twin-arginine protein translocation, subunit TatB       | U | Nmul_A0809 | COG1826 | 63  | 6.00E-12  |
| Twin-arginine protein translocation, subunit TatA       | U | Nmul_A0810 | COG1826 | 67  | 3.00E-13  |

Supplemental Fig. 1A. Circle diagram of *N. multiformis* chromosome.

Rings from outside to the center: 1) Genes on forward strand (color by COG categories\*); 2) Genes on reverse strand (color by COG categories); 3) RNA genes (tRNAs green, sRNAs red); 4 IS elements (red); ring 5 cytochrome and related (blue), ring 6 transporters (cyan), ring 7 response regulators (red), ring 8 pep\_anchor elements (green), ring 9 amo (magenta), hao (brown), hyd/hyp (black), ure (gold), nirK (skyblue), ring 10 GC content ring 11 GC skew.

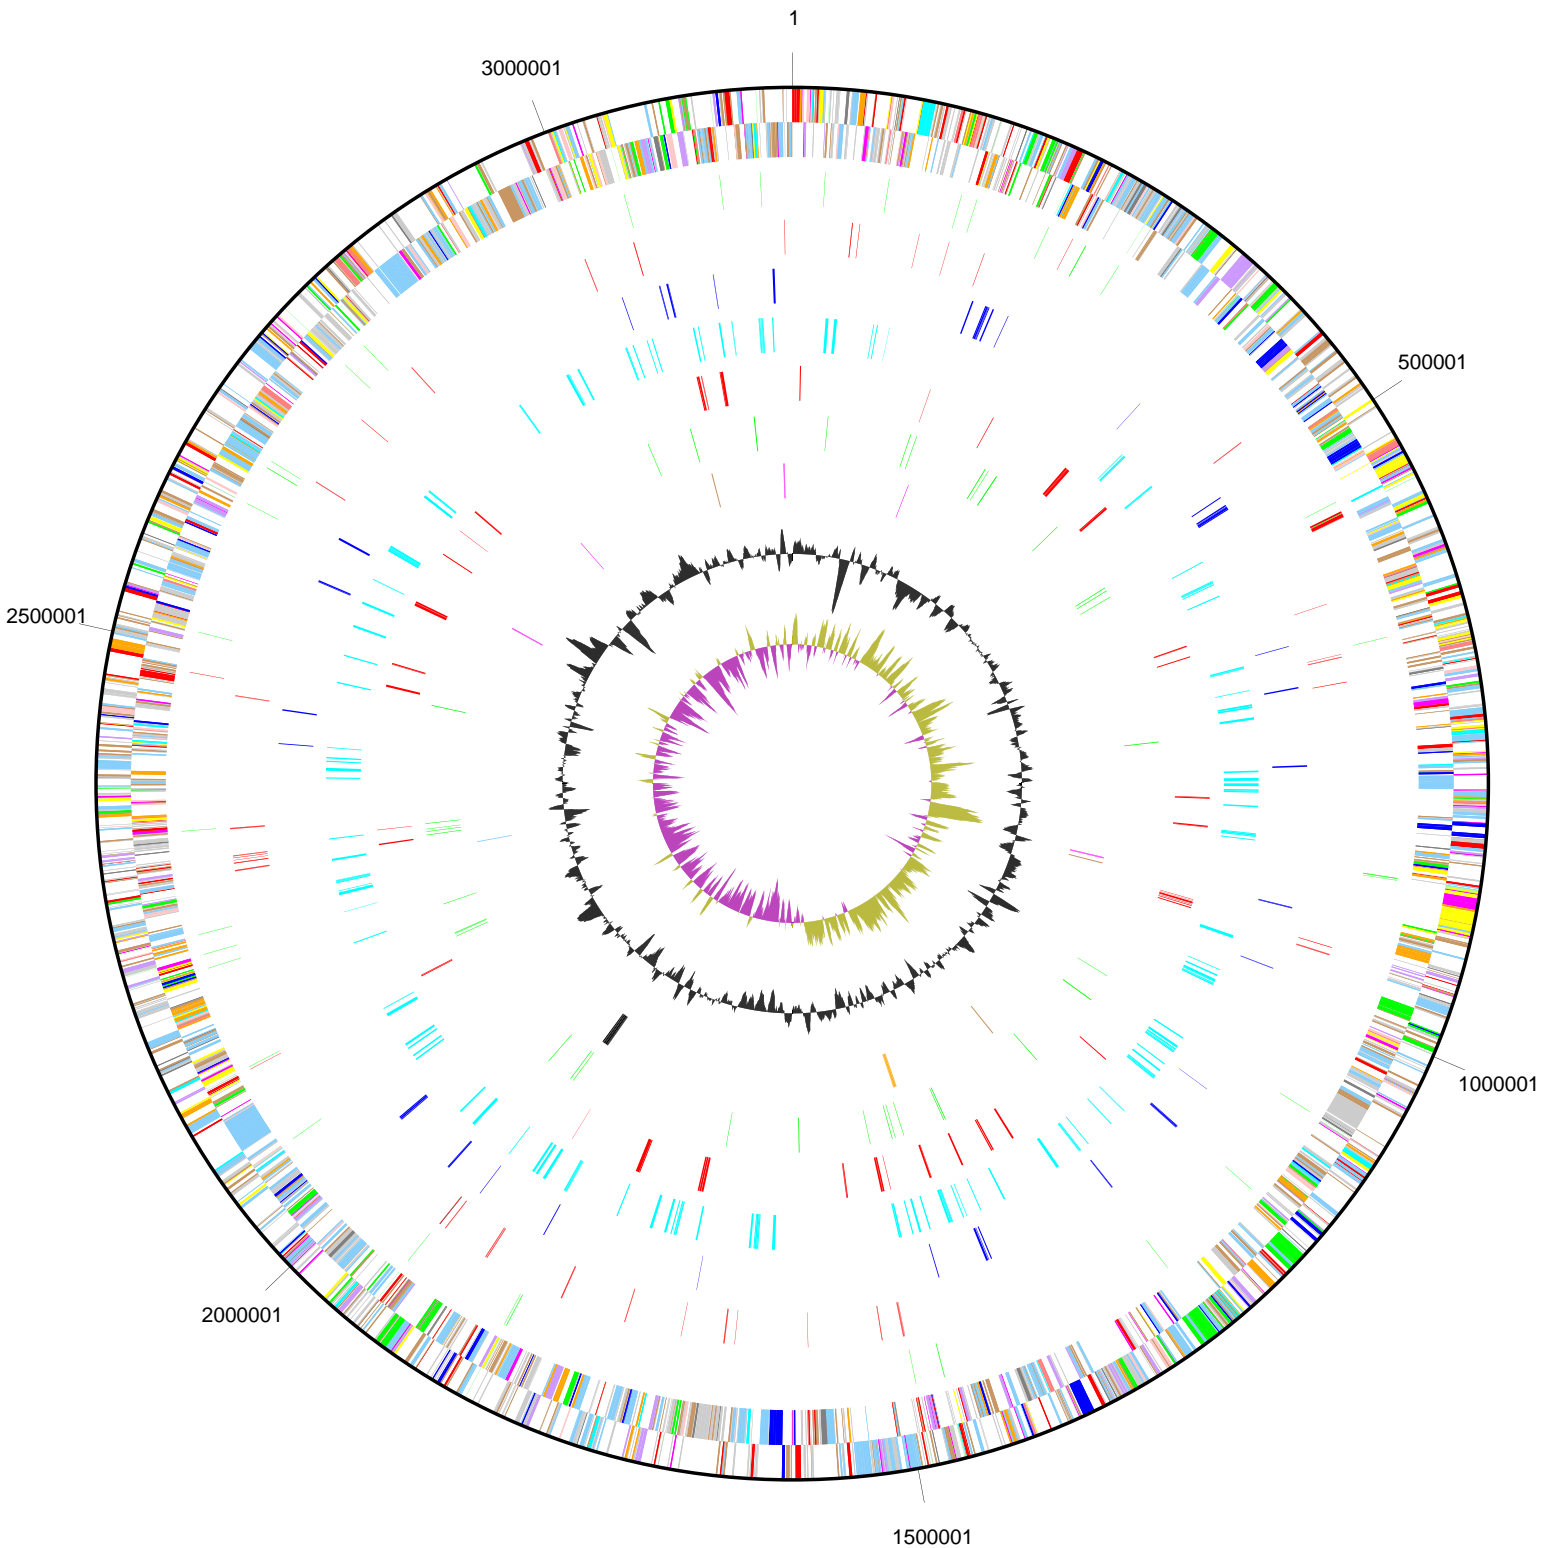

**Supplemental Figure 1B.** Plasmids 1, 2 and 3 of *N. multiformis*. Rings from outside to the center: 1) Genes on forward strand (color by COG categories\*); 2) Genes on reverse strand (color by COG categories); 3) GC content ring 4) GC skew.

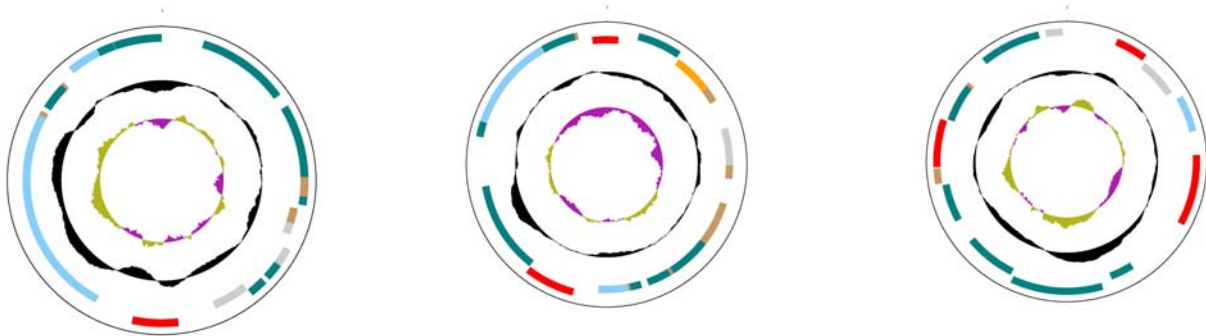

\*Key to COG Code Colors

| COG Code | COG Function Definition                                       |
|----------|---------------------------------------------------------------|
| [A]      | RNA processing and modification                               |
| [B]      | Chromatin structure and dynamics                              |
| [C]      | Energy production and conversion                              |
| [D]      | Cell cycle control, cell division, chromosome partitioning    |
| [E]      | Amino acid transport and metabolism                           |
| [F]      | Nucleotide transport and metabolism                           |
| [G]      | Carbohydrate transport and metabolism                         |
| [H]      | Coenzyme transport and metabolism                             |
| [I]      | Lipid transport and metabolism                                |
| [J]      | Translation, ribosomal structure and biogenesis               |
| [K]      | Transcription                                                 |
| [L]      | Replication, recombination and repair                         |
| [M]      | Cell wall/membrane/envelope biogenesis                        |
| [N]      | Cell motility                                                 |
| [O]      | Posttranslational modification, protein turnover, chaperones  |
| [P]      | Inorganic ion transport and metabolism                        |
| [Q]      | Secondary metabolites biosynthesis, transport and catabolism  |
| [R]      | General function prediction only                              |
| [S]      | Function unknown                                              |
| [T]      | Signal transduction mechanisms                                |
| [U]      | Intracellular trafficking, secretion, and vesicular transport |
| [V]      | Defense mechanisms                                            |
| [W]      | Extracellular structures                                      |
| [Y]      | Nuclear structure                                             |
| [Z]      | Cytoskeleton                                                  |

**Supplemental Figure 2.** Nmul\_ A2677-2668. Doubled two component systems in front of genes related to oligosaccharide synthesis, decarboxylase, and asparagine synthase.

## Nmul\_ 2677-2668

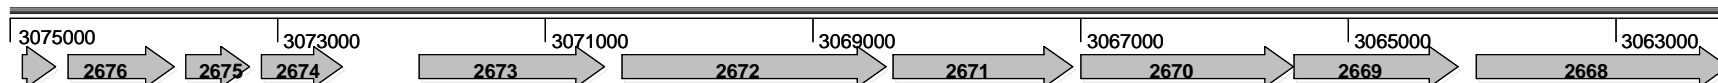

| <b>Locus</b><br>Nmul_A | <b>Putative Encoded Function</b>                                                                                                                 |
|------------------------|--------------------------------------------------------------------------------------------------------------------------------------------------|
| 2676                   | periplasmic serine protease/peptidase with signal peptide PDZ domain, possible membrane anchor for signaling complex                             |
| 2675                   | response regulator receiver protein CheY-like                                                                                                    |
| 2674                   | two-component transcriptional regulator LuxR family                                                                                              |
| 2673                   | Sugar transferase involved in LPS synthesis (Undecaprenyl-phosphate galactosephosphotransferase) 5 TM helices                                    |
| 2672                   | periplasmic sensor signal transduction, histidine kinase regulating C4-dicarboxylate transport system (COG4191), signal peptide and 8 TM helices |
| 2671                   | Response regulator containing CheY-like receiver AAA-type ATPase and DNA-binding domains, Sigma -54                                              |
| 2670                   | Acyl-CoA synthetases (AMP-forming)/AMP-acid ligases II                                                                                           |
| 2669                   | Orn/DAP/Arg decarboxylase family 2, polyamine synthesis                                                                                          |
| 2668                   | asparagine synthase, glutamine hydrolyzing.                                                                                                      |

**Supplemental Fig. 3.** Putative pyoverdine cluster in *N. multiformis* and comparison to genes identified in *Pseudomonas aeruginosa* Pa01 (PA), *Pseudomonas putida* KT2440 (PP), *Pseudomonas fluorescens* PfO-1 (Pfl), and *Pseudomonas syringe* DC3000 (PSPTO).

## Nmul\_A1822-1835

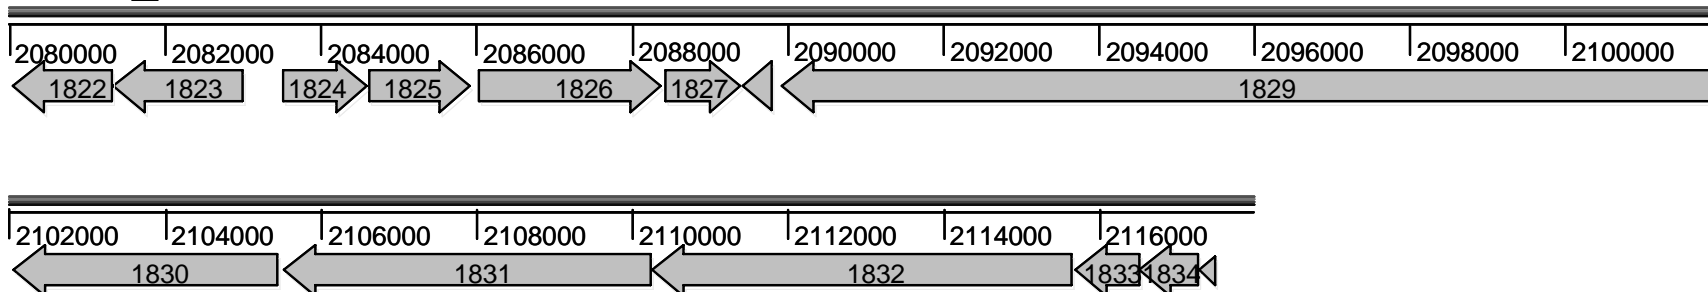

| CDS in <i>N. multiformis</i> | Amino Acids | Putative Encoded Function                                                                                                                     | Similar CDS and Gene Designations in <i>Pseudomonas</i> |
|------------------------------|-------------|-----------------------------------------------------------------------------------------------------------------------------------------------|---------------------------------------------------------|
| Nmul_A1822                   | 428         | 4 TM helices PepSY-associated, Fe responsive membrane protein                                                                                 | PA2465                                                  |
| Nmul_A1823                   | 555         | Cyclic peptide transporter, 6 TM helices, siderophore export                                                                                  | PA2397, PP_4216, PSPTO_2153, <i>pvdE</i>                |
| Nmul_A1824                   | 364         | Hypothetical acetylase                                                                                                                        | Pfl_3942                                                |
| Nmul_A1825                   | 435         | Signal peptide, Lysine/ornithine N5 monooxygenase [EC:1.14.13.-]                                                                              | PP3796, PA2384 <i>pvdA</i>                              |
| Nmul_A1826                   | 784         | TonB-dependent outer membrane siderophore receptor                                                                                            | PA2398, PP_4217, <i>fpvA</i>                            |
| Nmul_A1827                   | 323         | Lipolytic enzyme, esterase/lipase                                                                                                             | PP_4218                                                 |
| Nmul_A1828                   | 129         | hypothetical                                                                                                                                  |                                                         |
| Nmul_A1829                   | 4037        | Non-ribosomal peptide synthase (NRPS) siderophore sidechain                                                                                   | PA2402, PSPTO_2150, PP_4219; <i>pvdI</i>                |
| Nmul_A1830                   | 3417        | NRPS siderophore sidechain                                                                                                                    | PSPTO_2147, PP4221, <i>pvdJ</i>                         |
| Nmul_A1831                   | 1574        | Polyketide synthase modules, beta-ketoacyl synthase:acyl transferase; Short-chain dehydrogenase; Phosphopantetheine-binding, acyl transferase | Matches in Cyanobacteria                                |
| Nmul_A1832                   | 1801        | NRPS                                                                                                                                          | PSPTO_2135, PP_4243 (these are longer)                  |
| Nmul_A1833                   | 280         | 4'-phosphopantetheinyl transferase                                                                                                            | Matches in <i>Delftia</i> , <i>Burkholderia</i>         |
| Nmul_A1834                   | 253         | Thioesterase involved in NRPS                                                                                                                 | PA2411, Psyr_1944                                       |
| Nmul_A1835                   | 76          | MbtH-like protein                                                                                                                             | PA2412, Psyr_1947                                       |
| Nmul_A1839                   | 169         | Sigma factor Fec-I like                                                                                                                       | PA2426, PP4244, <i>pvdS</i>                             |
